# Supplementary material for: Airlift bioreactor–based strategies for prolonged semi-continuous cultivation of edible Agaricomycetes
Source: Springer Nature journal article supplement (doi:10.1007/s00253-024-13220-4), 2024-06-18
Supplement: MOESM1 [file 253_2024_13220_MOESM1_ESM.pdf]

**Air-lift bioreactor-based strategies for prolonged semi-continuous cultivation of edible *Agaricomycetes***

Federico Cerrone<sup>1,2</sup>, Conor Ó Lochlainn<sup>1,2</sup>, Tony Callaghan<sup>3</sup>, Peter McDonald<sup>3</sup>, Kevin O'Connor<sup>1,2,4\*</sup>

<sup>1</sup>BiOrbic Bioeconomy Research Centre, O'Brien Centre for Science (Science East) University College Dublin, Belfield Campus Dublin, Ireland

<sup>2</sup>School of Biomolecular and Biomedical Sciences University College Dublin, Belfield Campus Dublin, Ireland

<sup>3</sup>Commercial Mushroom Producers, Units 7/8 Newgrove Industrial Estate, Monaghan, Ireland

<sup>4</sup>Bioplastech Ltd NovaUCD, Belfield Innovation Park, University College Dublin, Ireland

\*[Kevin.oconnor@ucd.ie](mailto:Kevin.oconnor@ucd.ie), telephone and fax number +353(1)7162198

Supplementary Figure S1

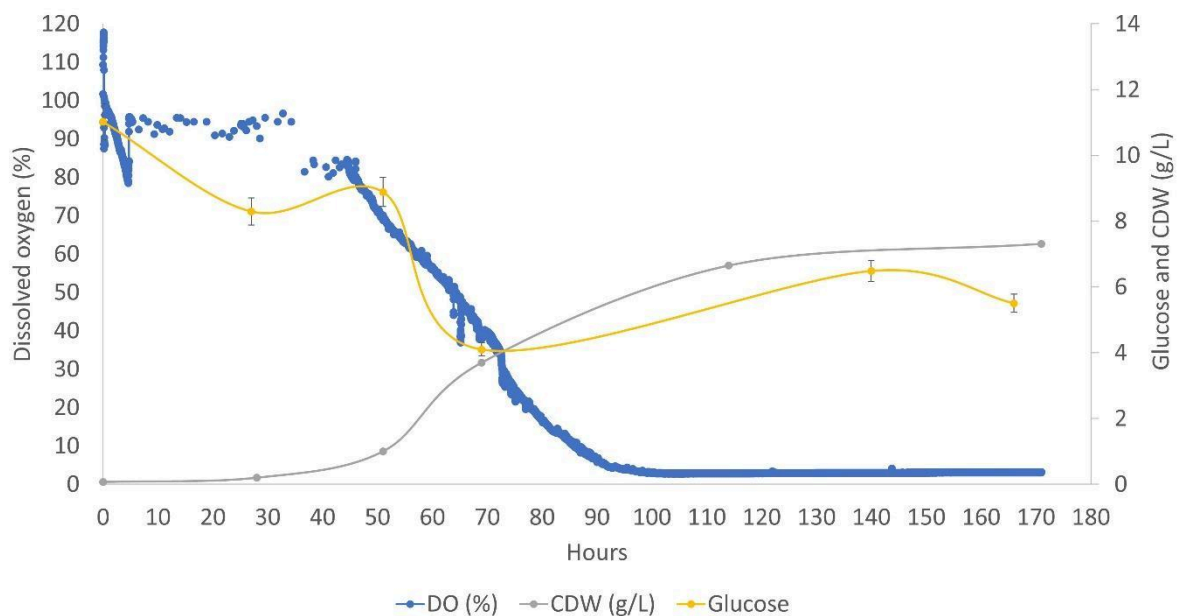

Supplementary Figure S1. Semicontinuous fermentation targeting a dilution rate ( $D$ ) of  $0.04 \text{ h}^{-1}$  for the growth of *T. versicolor* after a batch phase of 31 h.

Supplementary Figure S2

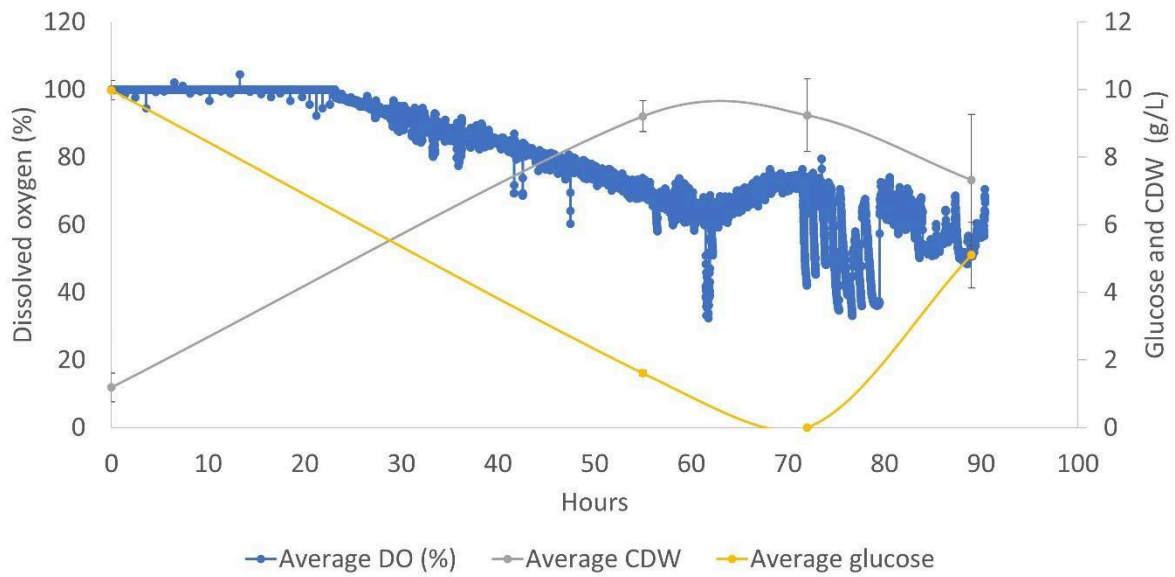

Supplementary Figure S2. Semicontinuous fermentation targeting a dilution rate ( $D$ ) of  $0.1 \text{ h}^{-1}$  for the growth of *T. versicolor* after a batch phase of 71 h.

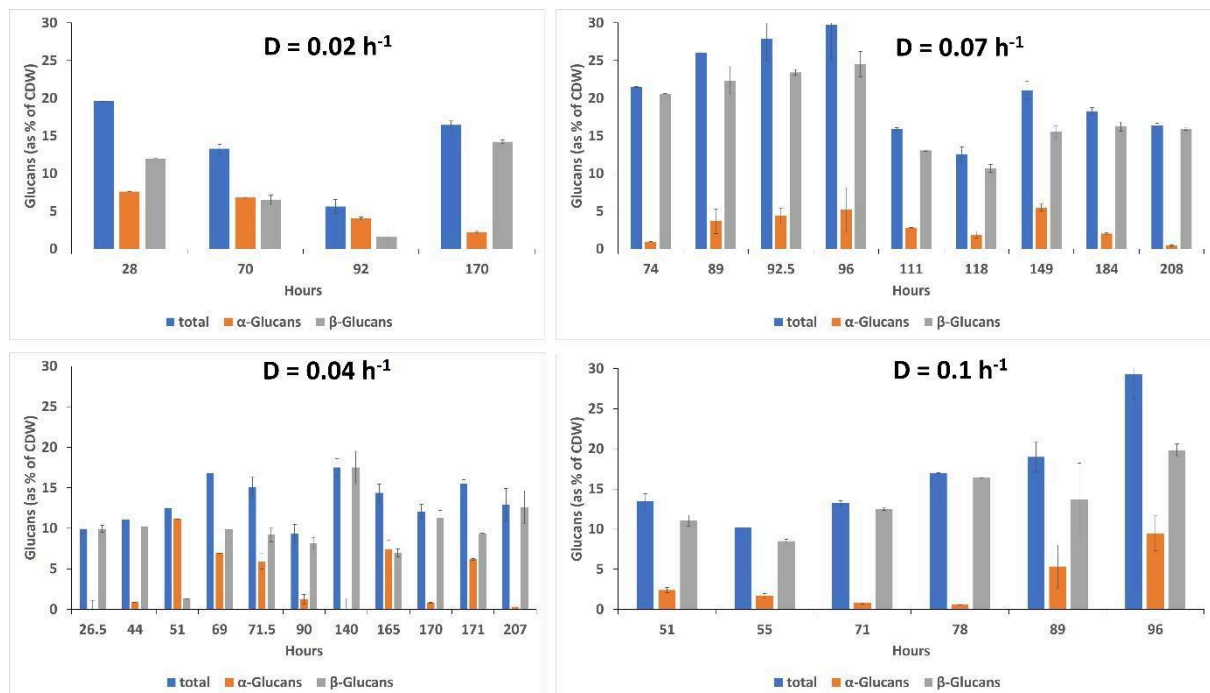

Supplementary Figure S3. Total,  $\alpha$  and  $\beta$ -glucans production trends by *T. versicolor* cultivated in semi-continuous fermentation with different dilution rates,  $D$  (namely,  $D$  of  $0.02$ ,  $0.04$ ,  $0.07$  and  $0.1 \text{ h}^{-1}$ )
